# Supplementary material for: Pleiotropic Potential of Evernia prunastri Extracts and Their Main Compounds Evernic Acid and Atranorin: In Vitro and In Silico Studies
Source: MDPI journal article supplement (doi:10.3390/molecules29010233), 2023-12-31
Supplement: s1 [file s1]

Supplementary Materials

# Pleiotropic Potential of *Evernia prunastri* Extracts and Their Main Compounds Evernic Acid and Atranorin: In Vitro and In Silico Studies

Elżbieta Studzińska-Sroka <sup>1,\*</sup>, Magdalena Bulicz <sup>1</sup>, Marika Henkel <sup>1</sup>, Natalia Rosiak <sup>1</sup>,  
Magdalena Paczkowska-Walendowska <sup>1</sup>, Dominik Sz wajgier <sup>2</sup>, Ewa Baranowska-Wójcik <sup>2</sup>,  
Katarzyna Korybalska <sup>3</sup> and Judyta Cielecka-Piontek <sup>1</sup>

<sup>1</sup> Department of Pharmacognosy and Biomaterials, Poznan University of Medical Sciences, Rokietnicka 3 Str., 60-806 Poznań, Poland

<sup>2</sup> Department of Biotechnology, Microbiology and Human Nutrition, University of Life Sciences in Lublin, Skromna 8 Str., 20-704 Lublin, Poland

<sup>3</sup> Department of Patophysiology, Poznan University of Medical Science, Rokietnicka 8 Str., 60-806 Poznań, Poland

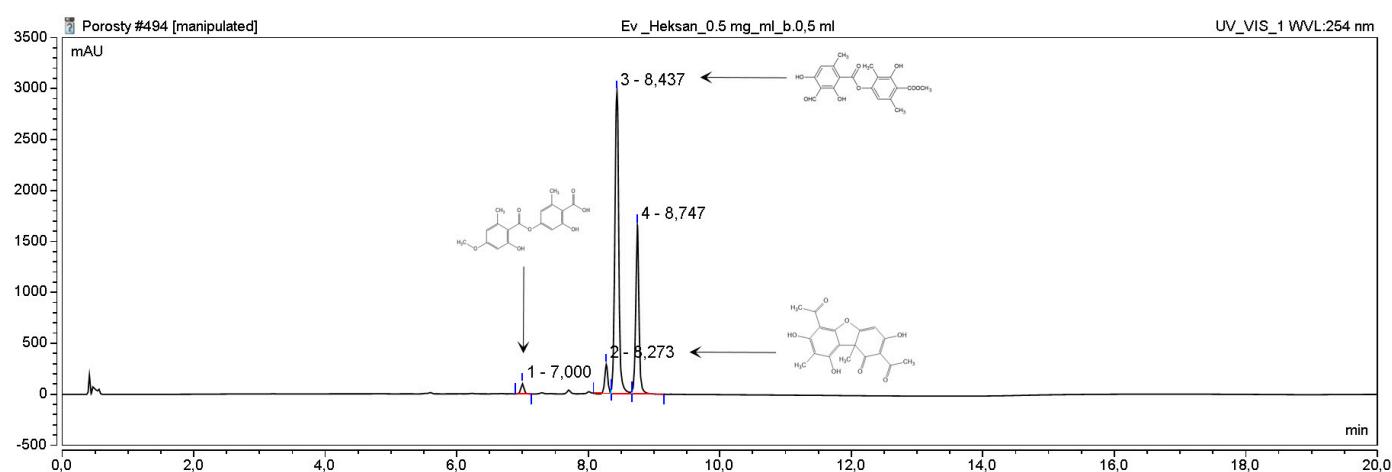

Figure S1. The chromatogram of hexane extract from *E. prunastri*, showing the identified compounds, i.e., evernic acid, atranorin and (+)-usnic acid, respectively.

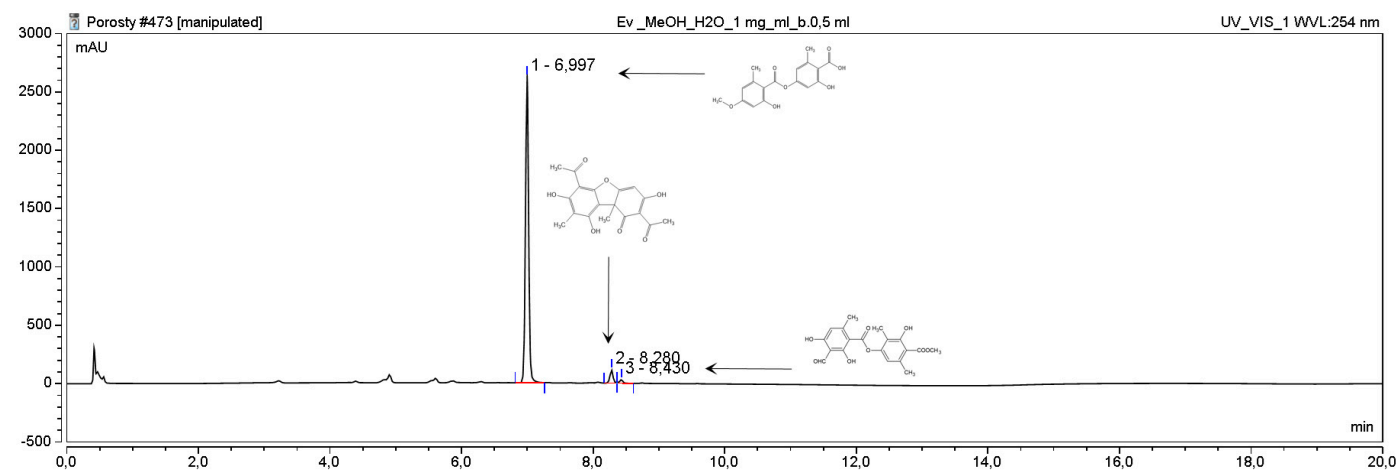

Figure S2. The chromatogram of methanol-water extract from *E. prunastri*, showing the identified compounds, i.e., evernic acid (6.997 min), atranorin (8.430 min) and (+)-usnic acid (8.280), respectively.

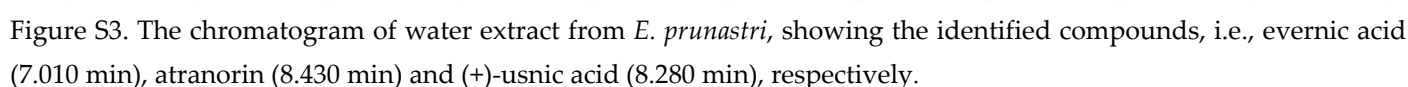

| Target molecule | PDB code | Binding Energy<br>[kcal/mol] |           | $K_i$<br>[nM] |           | Receptor contact |           |
|-----------------|----------|------------------------------|-----------|---------------|-----------|------------------|-----------|
|                 |          | evernic acid                 | atranorin | evernic acid  | atranorin |                  |           |
|                 |          |                              |           |               |           | evernic acid     | atranorin |
| COX-2*          | 5F1A     | -11.85                       | - 12.47   | 2.08          | 0.72      | ALA168           | ALA168    |
|                 |          |                              |           |               |           | GLN172           | HIS176    |
|                 |          |                              |           |               |           | PHE179           | PHE179    |
|                 |          |                              |           |               |           | THR181           | THR181    |
|                 |          |                              |           |               |           | ASN351           | ASN351    |
|                 |          |                              |           |               |           | HIS355           | TYR354    |
|                 |          |                              |           |               |           | TRP356           | HIS355    |
|                 |          |                              |           |               |           | HIS357           | TRP356    |
|                 |          |                              |           |               |           | LEU360           | HIS357    |
| AChE*           | 4BDT     | −11.97                       | −13.22    | 1.69          | 0.21      |                  | ASP70     |
|                 |          |                              |           |               |           | THR79            | THR79     |
|                 |          |                              |           |               |           | TRP82            | TRP82     |
|                 |          |                              |           |               |           | GLY116           | GLY116    |
|                 |          |                              |           |               |           | TYR129           | TYR120    |
|                 |          |                              |           |               |           | TYR333           | TYR129    |
|                 |          |                              |           |               |           | HIS443           | TYR333    |
|                 |          |                              |           |               |           |                  | TRP435    |
|                 |          |                              |           |               |           |                  | TYR445    |
| BChE            | 4BDS     | −10.67                       | −11.47    | 15.07         | 3.92      | TRP79            |           |
|                 |          |                              |           |               |           | GLY113           | GLY113    |
|                 |          |                              |           |               |           | TYR125           | SER195    |
|                 |          |                              |           |               |           | SER195           | LEU283    |
|                 |          |                              |           |               |           | ALA325           | PHE326    |
|                 |          |                              |           |               |           | TYR329           | HIS433    |
|                 |          |                              |           |               |           | TRP425           |           |
| HIS433          |          |                              |           |               |           |                  |           |
| Tyrosinase      | 2Y9X     | −9.49                        | −10.42    | 110.47        | 23.01     | HIS60            | HIS60     |
|                 |          |                              |           |               |           | HIS84            | HIS84     |
|                 |          |                              |           |               |           | HIS243           | HIS243    |

|                        |      |       |        |        |    |        |        |
|------------------------|------|-------|--------|--------|----|--------|--------|
|                        |      |       |        |        |    | ASN259 | ASN259 |
|                        |      |       |        |        |    | HIS262 | PHE263 |
|                        |      |       |        |        |    | PHE263 | ALA285 |
|                        |      |       |        |        |    | MET279 | HIS295 |
|                        |      |       |        |        |    | VAL282 |        |
|                        |      |       |        |        |    | ASP197 |        |
| $\alpha$ -glucosidase* | 2QMJ | −8.66 | +51.81 | 448.87 | na | TRP400 | na     |
|                        |      |       |        |        |    | PHE444 |        |
|                        |      |       |        |        |    | ARG520 |        |

K<sub>i</sub> – estimated inhibition constant, “na” – not active \*– indicates statistically significant differences ( $p \leq 0.05$ ) in enzyme activity (the significance determined based on the comparison of binding energies).
